# Supplementary material for: Chinese patent herbal medicine (Shufeng Jiedu capsule) for acute upper respiratory tract infections: A systematic review and meta-analysis
Source: PubMed Central journal article supplement — Integr Med Res. 2021 Apr 2;10(3):100726. doi: 10.1016/j.imr.2021.100726 (PMC8099504; doi:10.1016/j.imr.2021.100726), 2021-04-02
Supplement: mmc1.pdf [file mmc1.pdf]

## Supplementary materials

**Table S1. Herbal compositions of Shufeng Jiedu capsule.**

| Latin botanic Name                      | Chinese Pinyin Name | Content and index component (dosage per 1000 capsules) <sup>a</sup> |
|-----------------------------------------|---------------------|---------------------------------------------------------------------|
| <i>Fallopia japonica</i> (Houtt.)       | Hu Zhang            | 450g                                                                |
| <i>Forsythia suspense</i> (Thunb.)      | Lian Qiao           | 360g                                                                |
| <i>Isatis indigotica</i> (Fort.)        | Ban Lan Gen         | 360g                                                                |
| <i>Bupleurum chinense</i> (DC.)         | Chai Hu             | 360g                                                                |
| <i>Patrinia scabiosaefolia</i> (Fisch.) | Bai Jiang Cao       | 360g                                                                |
| <i>Verbena officinalis</i> (L.)         | Ma Bian Cao         | 360g                                                                |
| <i>Phragmites communis</i> (Trin.)      | Lu Gen              | 270g                                                                |
| <i>Glycyrrhiza uralensis</i> (Fisch.)   | Gan Cao             | 180g                                                                |

Notes: a, the data of the content of Shufeng Jiedu is from *Chinese Pharmacopoeia*.

**Table S2. Definitions of cure rate in 21 trials.**

| <b>Study ID</b>          | <b>Criteria for cure rate</b>                              |
|--------------------------|------------------------------------------------------------|
| <b>Common cold</b>       |                                                            |
| Chen H 2016[22]          | Resolution of fever and symptoms in 5 d                    |
| Zhou XF 2016[23]         | Resolution of fever and symptoms in 5 d                    |
| Wang Q 2018[24]          | Resolution of fever and symptoms in 5 d                    |
| Zhang YP 2014[25]        | Resolution of fever in 24hr without recurrence.            |
| Ye XQ 2013[26]           | NR                                                         |
| Zhao JL 2018[27]         | Resolution of fever and symptoms in 3 d                    |
| Zhang B 2020[28]         | Resolution of fever and symptoms in 3 d                    |
| Xu YL 2015[29]           | Resolution of fever and symptoms in 3 d                    |
| Wu XJ 2015[30]           | Resolution of fever in 3d without recurrence               |
| Zhao LB 2020 [31]        | Resolution of fever and symptoms in 5 d                    |
| <b>Acute rhinitis</b>    |                                                            |
| Li Y 2015[32]            | Resolution of runny and stuffy nose in 5 d                 |
| <b>Herpangina</b>        |                                                            |
| Yang Y 2019[33]          | Resolution of fever and herpes in 5 d                      |
| Yang ML 2016[34]         | Resolution of fever and herpes in 5 d                      |
| Liu CX 2015[35]          | Resolution of fever and herpes in 5 d                      |
| <b>Acute pharyngitis</b> |                                                            |
| Zhu SM 2019[36]          | Resolution of fever and sore throat in 5 d                 |
| Jiang JQ 2018[37]        | Resolution of fever and sore throat in 5 d                 |
| Dong W 2020 [38]         | NR                                                         |
| Zhou QQ 2020 [39]        | Resolution of sore throat in 5 d                           |
| <b>Acute tonsillitis</b> |                                                            |
| Zhang JY 2015[40]        | Resolution of fever, sore throat and swollen tonsil in 5 d |
| Wang ZB 2018[41]         | Resolution of fever, sore throat and swollen tonsil in 5 d |
| Li G 2017[42]            | Resolution of fever, sore throat and swollen tonsil in 5 d |
| Li BR 2020 [43]          | Resolution of fever, sore throat and swollen tonsil in 5 d |
| Zhao ZY 2015[44]         | Resolution of fever, sore throat and swollen tonsil in 5 d |
| Yang X2017[45]           | Resolution of fever, sore throat and swollen tonsil in 5 d |
| Huang PL 2016[46]        | Resolution of fever, sore throat and swollen tonsil in 5 d |

**Notes:** NR, Not reported; d, days; hours, hr.

**Table S3. Evidence summary of common cold: SFJD versus placebo.**

| Certainty assessment      |                   |              |               |              |                      |                  | N <sup>o</sup> of patients |               | Effect                        |                                                       | Certainty     | Importance |
|---------------------------|-------------------|--------------|---------------|--------------|----------------------|------------------|----------------------------|---------------|-------------------------------|-------------------------------------------------------|---------------|------------|
| N <sup>o</sup> of studies | Study design      | Risk of bias | Inconsistency | Indirectness | Imprecision          | Publication bias | SFJD                       | placebo       | Relative (95% CI)             | Absolute (95% CI)                                     |               |            |
| <b>Cure rate</b>          |                   |              |               |              |                      |                  |                            |               |                               |                                                       |               |            |
| 1                         | randomized trials | not serious  | not serious   | not serious  | serious <sup>a</sup> | undetected       | 53/120 (44.2%)             | 11/118 (9.3%) | <b>RR 4.74</b> (2.61 to 8.61) | <b>349 more per 1,000</b> (from 185 more to 525 more) | ⊕⊕⊕○ MODERATE | CRITICAL   |

\*The risk in the intervention group (and its 95% confidence interval) is based on the assumed risk in the comparison group and the relative effect of the intervention (and its 95% CI). GRADE Working Group grades of evidence.

Moderate certainty (⊕⊕⊕○): We are moderately confident in the effect estimate. The true effect is likely to be close to the estimate of the effect, but there is a possibility that it is substantially different.

**Notes:** SFJD, ShuFeng JieDu; CI, Confidence interval; RR, Risk ratio; a, A small number of events of less than 300.

**Table S4. Evidence summary of herpangina in children: SFJD + conventional drug versus conventional drug.**

| Certainty assessment             |                   |                      |                      |              |                      |                  | N <sup>o</sup> of patients |                   | Effect                        |                                                      | Certainty     | Importance |
|----------------------------------|-------------------|----------------------|----------------------|--------------|----------------------|------------------|----------------------------|-------------------|-------------------------------|------------------------------------------------------|---------------|------------|
| N <sup>o</sup> of studies        | Study design      | Risk of bias         | Inconsistency        | Indirectness | Imprecision          | Publication bias | [SFJD +conventional drug   | Conventional drug | Relative (95% CI)             | Absolute (95% CI)                                    |               |            |
| <b>Time to fever resolution</b>  |                   |                      |                      |              |                      |                  |                            |                   |                               |                                                      |               |            |
| 2                                | randomized trials | serious <sup>a</sup> | serious <sup>b</sup> | not serious  | serious <sup>c</sup> | undetected       | 72                         | 68                | -                             | <b>MD 0.68 lower</b> (1.15 lower to 0.21 lower)      | ⊕○○○ VERY LOW | CRITICAL   |
| <b>Time to herpes resolution</b> |                   |                      |                      |              |                      |                  |                            |                   |                               |                                                      |               |            |
| 3                                | randomized trials | serious <sup>a</sup> | not serious          | not serious  | serious <sup>c</sup> | undetected       | 195                        | 191               | -                             | <b>MD 0.99 lower</b> (1.23 lower to 0.76 lower)      | ⊕⊕○○ LOW      | CRITICAL   |
| <b>cure rate</b>                 |                   |                      |                      |              |                      |                  |                            |                   |                               |                                                      |               |            |
| 3                                | randomized trials | serious <sup>a</sup> | not serious          | not serious  | serious <sup>d</sup> | undetected       | 138/195 (70.8%)            | 105/191 (55.0%)   | <b>RR 1.30</b> (1.12 to 1.51) | <b>165 more per 1,000</b> (from 66 more to 280 more) | ⊕⊕○○ LOW      | IMPORTANT  |

\*The risk in the intervention group (and its 95% confidence interval) is based on the assumed risk in the comparison group and the relative effect of the intervention (and its 95% CI). GRADE Working Group grades of evidence.

Low certainty (⊕⊕○○): Our confidence in the effect estimate is limited. The true effect may be substantially different from the estimate of the effect;

Very low certainty (⊕○○○): We have very little confidence in the effect estimate. The true effect is likely to be substantially different from the estimate of effect.

**Notes:** SFJD, ShuFeng JieDu; CI, Confidence interval; MD, Mean difference; RR, Risk ratio; a, The blinding method was not used; b, I square value was large; c, Number of patients included was less than 400; d, A small number of events of less than 300.

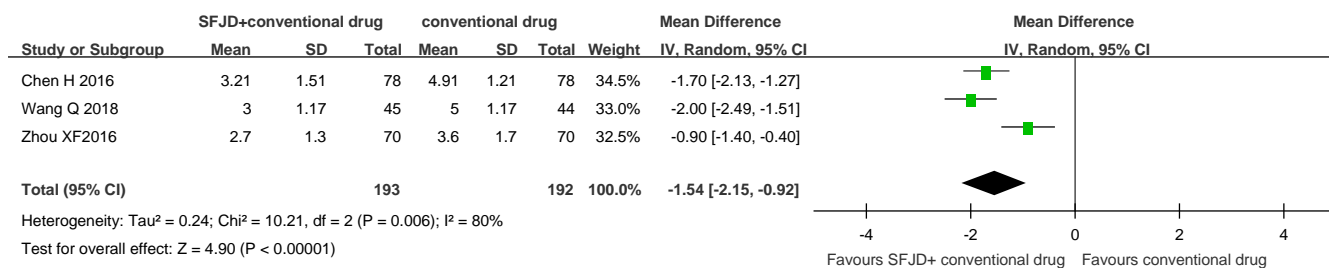

**Fig. S1 Time to fever resolution (d) in children with common cold**  
 SFJD: Shufeng Jiedu

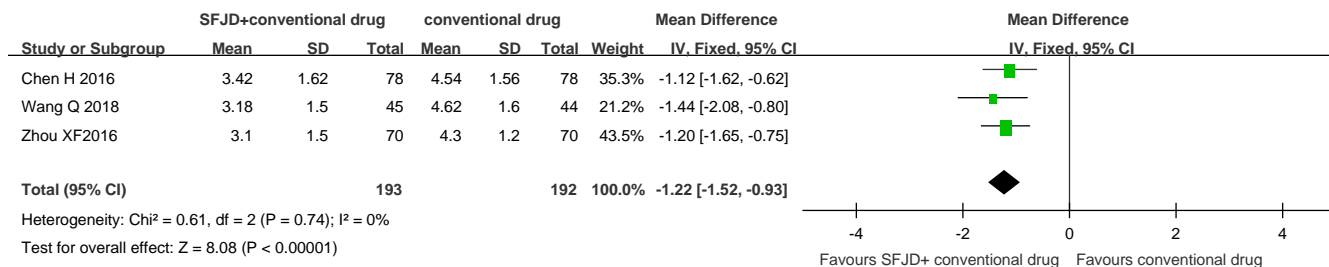

**Fig. S2 Time to cough resolution (d) in children with common cold**  
 SFJD: Shufeng Jiedu

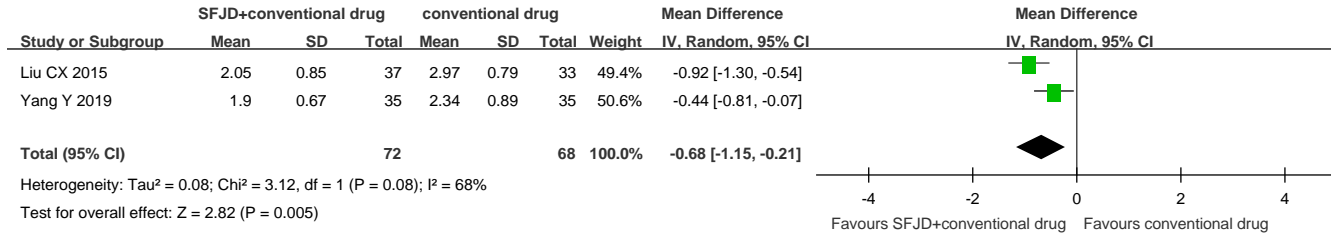

**Fig. S3 Time to fever resolution (d) in children with herpangina**  
 SFJD: Shufeng Jiedu

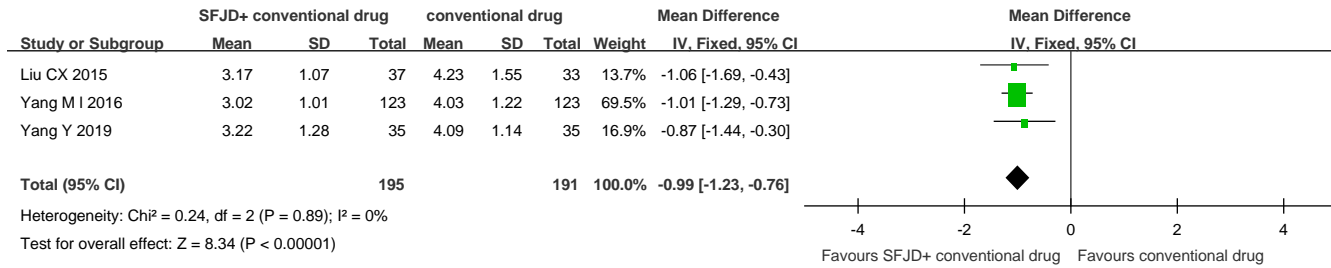

**Fig. S4 Time to blisters resolution (d) in children with herpangina**  
 SFJD: Shufeng Jiedu

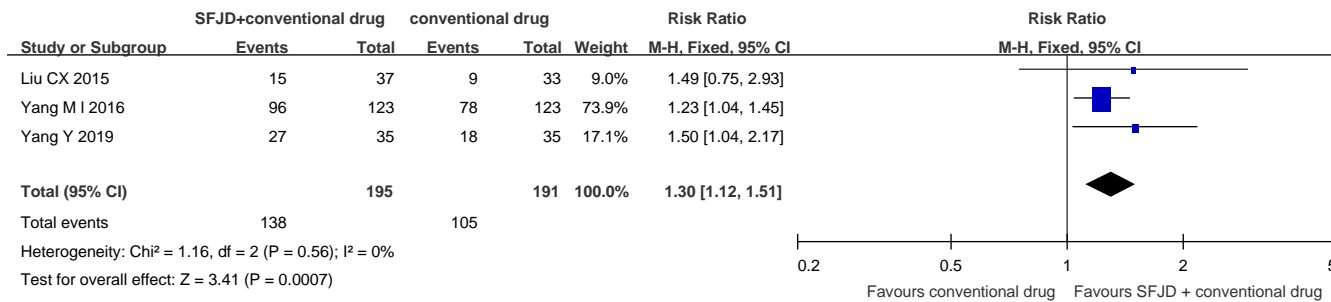

**Fig. S5 Cure rate in children with herpangina with a range (1- 5 days) of treatment**  
 SFJD: Shufeng Jiedu

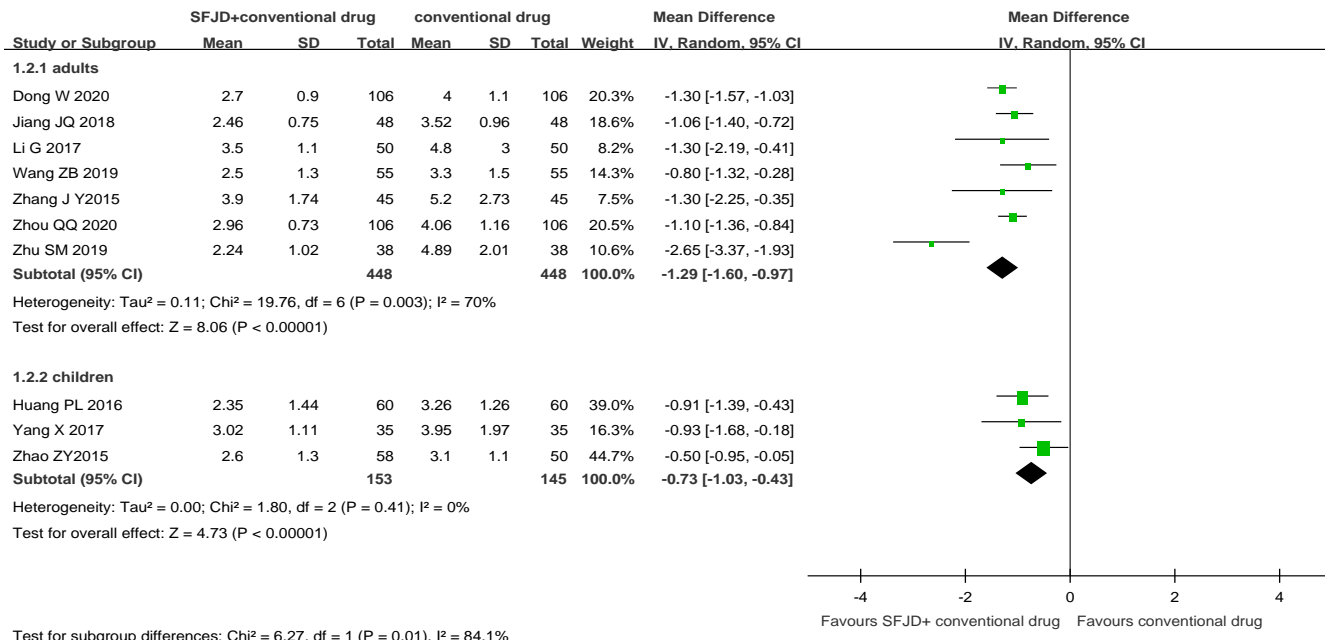

**Fig. S6 Time to sore throat resolution in acute tonsillitis and acute pharyngitis (d).**  
SFJD: Shufeng Jiedu

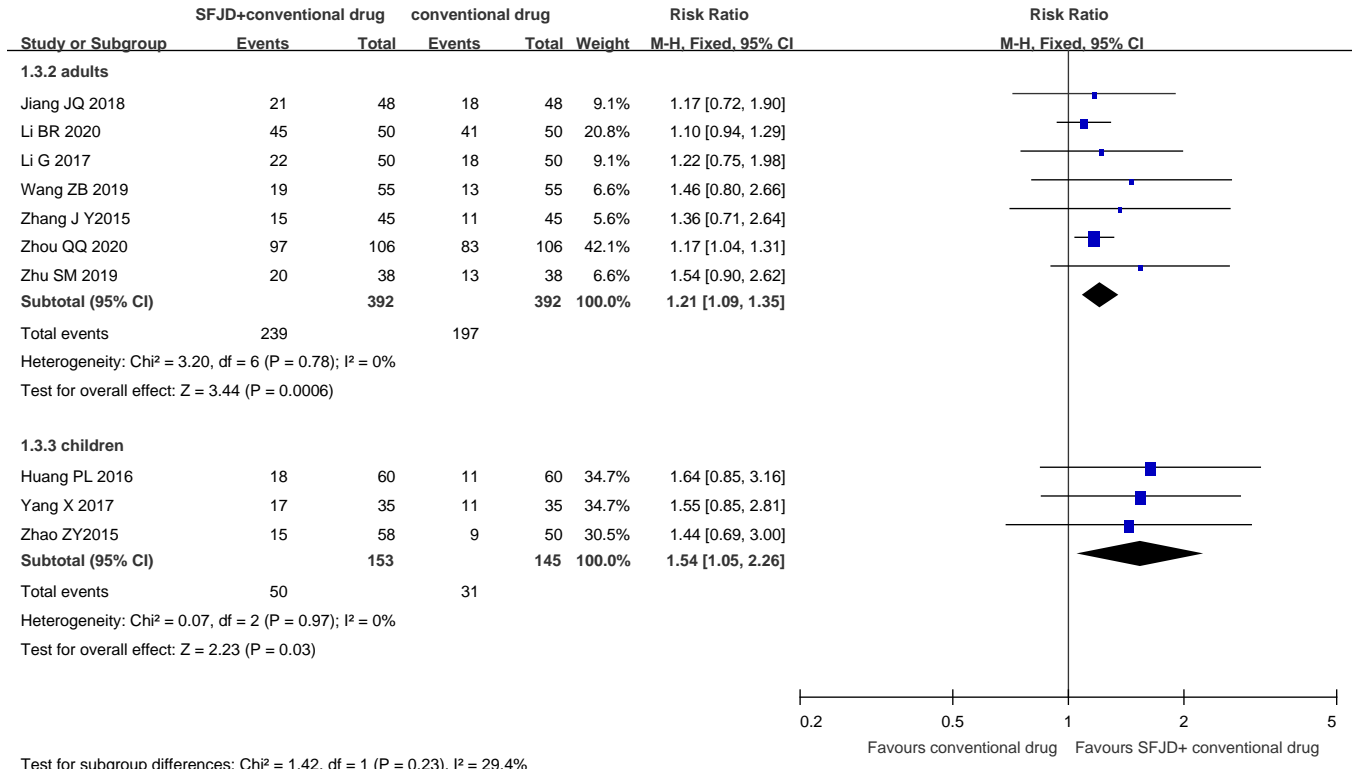

**Fig. S7 Cure rate with a range (1- 5 days) in acute tonsillitis and acute pharyngitis.**  
 SFJD: Shufeng Jiedu

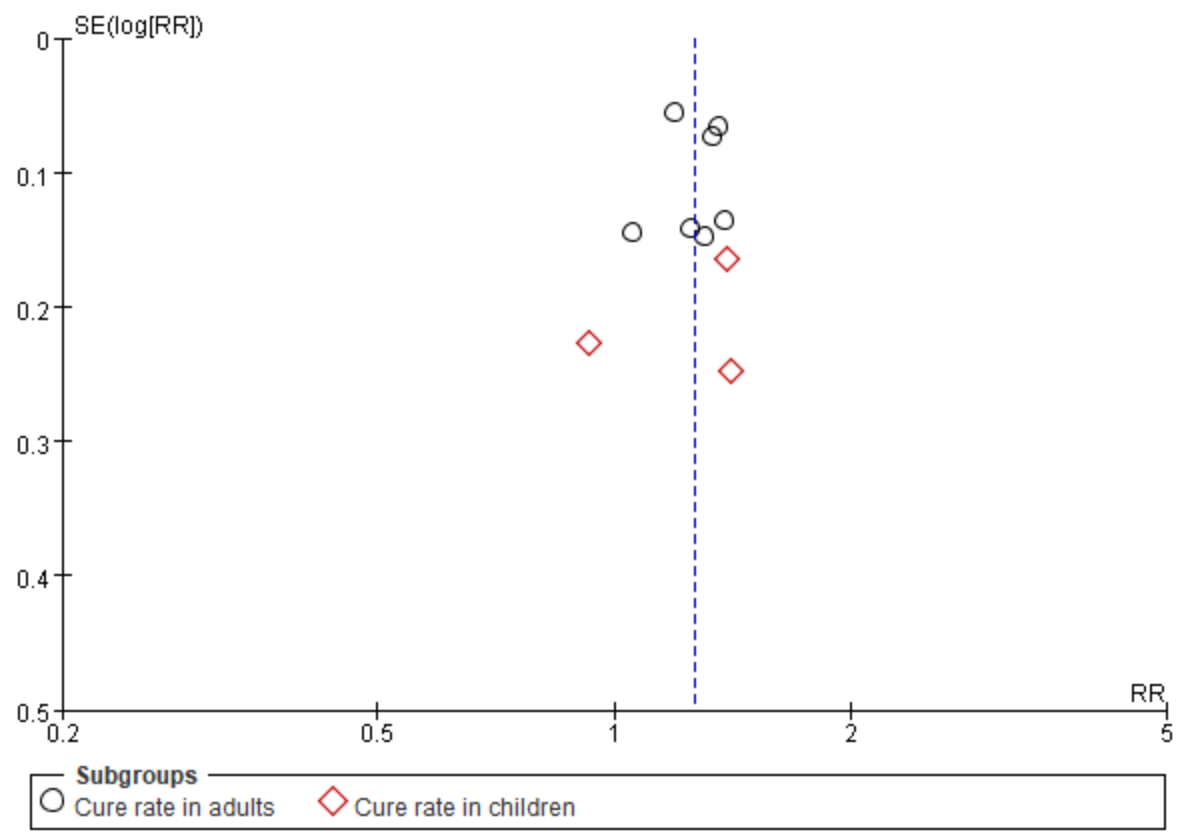

Fig. S8 Funnel plots of cure rate in common cold.



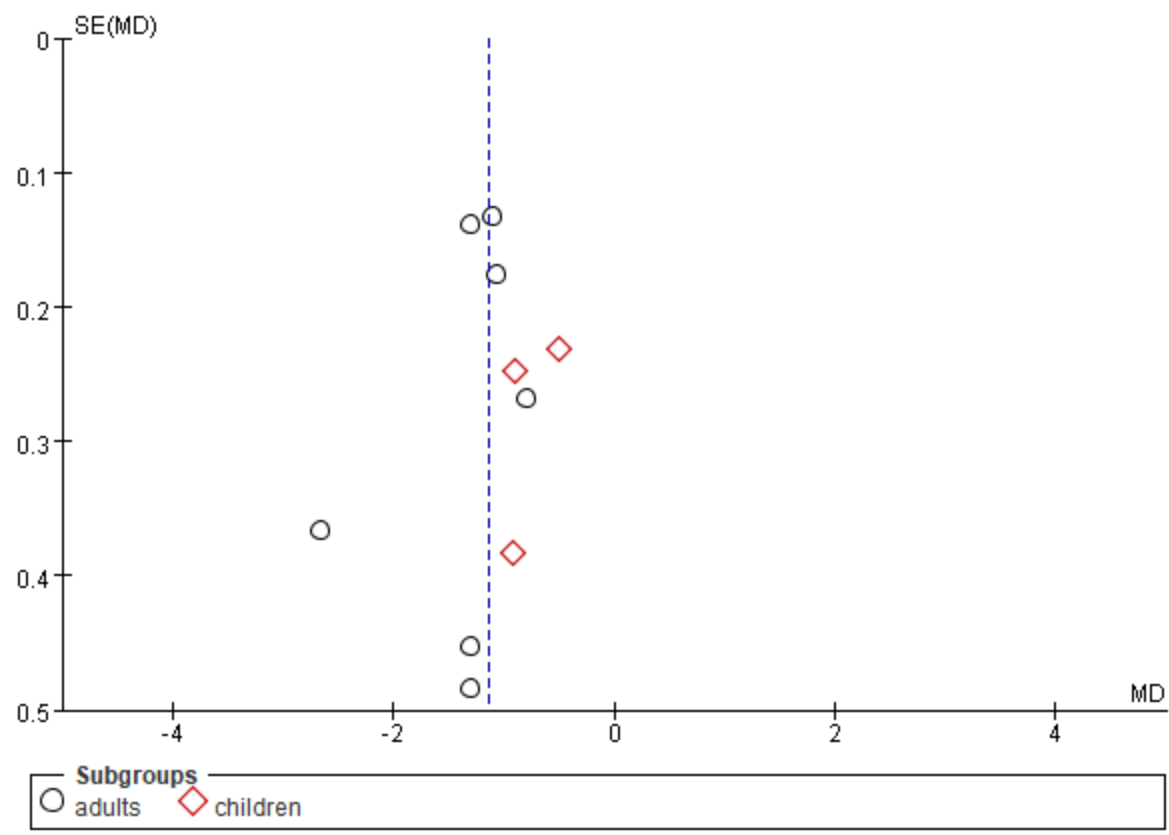

Fig. S9 Funnel plots of time to sore throat resolution in acute tonsillitis and acute pharyngitis

## Search strategy

### Four Chinese databases:

- China National Knowledge Infrastructure (CNKI)  
(主题: 疏风解毒胶囊) OR (摘要: 疏风解毒胶囊) AND (全文: 随机)
- Wanfang databases  
主题:(疏风解毒胶囊) OR 摘要:(疏风解毒胶囊) AND 全部:(随机)
- Chinese Scientific Journal Database (VIP)  
(题名或关键词=疏风解毒胶囊 OR 文摘=疏风解毒胶囊)
- SinoMed  
"疏风解毒胶囊"[常用字段:智能] OR "疏风解毒胶囊"[摘要:智能] AND "随机"[全部字段:智能]

### Four English databases:

- Pub Med  
(((Shufengjiedu[Title/Abstract]) OR Shu Feng Jie Du [Title/Abstract]) OR Shu-Feng-Jie-Du [Title/Abstract]) OR Shufeng Jiedu [Title/Abstract]) OR Shufeng-Jiedu [Title/Abstract].
- The Cochrane library  
(Shufengjiedu):ti,ab,kw OR (Shu Feng Jie Du):ti,ab,kw OR (Shu-Feng-Jie-Du):ti,ab,kw OR (Shufeng Jiedu):ti,ab,kw OR (Shufeng-Jiedu):ti,ab,kw.
- EMBASE  
'shufengjiedu':ab,ti OR 'shu-feng-jie-du':ab,ti OR 'shu feng jie du':ab,ti OR 'shufeng-jiedu':ab,ti OR 'shufeng jiedu':ab,ti
- Web of Science  
主题: (Shufengjiedu) OR 主题: (Shu Feng Jie Du) OR 主题: (Shu-Feng-Jie-Du) OR 主题: (Shufeng Jiedu) OR 主题: (Shufeng-Jiedu).

### Ongoing studies

- Clinical Trials.gov  
Shu Feng Jie Du or Shufeng Jiedu
- Chinese Clinical Trial Registry (<http://www.chictr.org.cn/index.aspx>)  
疏风解毒胶囊
